# Supplementary material
Source: publisher site journal article supplement (https://www.dovepress.com/get_supplementary_file.php?f=299819.docx)
Supplement: Supplementary file 1 [file get_supplementary_file.php]

**Supplementary materials**

**Table S1 Timing of changes in variability of NPPV-related parameter in the days before AECOPD**

**(-7 day to -4 day)**

| **Parameter** | **Days****#** | **AECOPD (n=31)** | | **Stable COPD (n=71)** | | |
| --- | --- | --- | --- | --- | --- | --- |
| **Difference (95% CI)¶** | **Adjusted**  **p-value*** | | **Difference (95% CI)¶** | **Adjustedp-value*** | |
| **Respiratory rate, breath/min** | -7 | 1.244 (-0.480 to 2.968) | 0.690 | | -0.020 (-0.224 to 0.184) | 0.844 | |
| -6 | 1.463 (-0.292 to 3.219) | 0.249 | | -0.012 (-0.207 to 0.184) | 0.905 | |
| -5 | 1.657 (-0.074 to 3.387) | 0.076 | | -0.048 (-0.243 to 0.146) | 0.622 | |
| -4 | 2.044 (0.273 to 3.815) | 0.011 | | -0.071 (-0.278 to 0.136) | 0.496 | |
| **Daily use, min/day** | -7 | -3.941 (-62.452 to 54.571) | 0.892 | | -15.037 (-30.712 to 0.638) | 0.060 | |
| -6 | 4.233 (-58.132 to 66.599) | 0.891 | | -9.741 (-25.112 to 5.629) | 0.210 | |
| -5 | 13.408 (-52.992 to 79.808) | 0.683 | | -4.860 (-19.141 to 9.422) | 0.500 | |
| -4 | 26.343 (-47.395 to 100.081) | 0.471 | | -2.846 (-18.227 to 12.536) | 0.713 | |
| **Leaks, L/min** | -7 | 2.612 (-1.840 to 7.063) | 0.240 | | -0.834 (-2.081 to 0.412) | 0.186 | |
| -6 | 2.063 (-2.496 to 6.623) | 0.363 | | -0.868 (-2.097 to 0.361) | 0.350 | |
| -5 | 2.031 (-2.358 to 6.420) | 0.352 | | -0.724 (-1.989 to 0.540) | 0.257 | |
| -4 | 1.541 (-2.709 to 5.791) | 0.465 | | -0.645 (-1.935 to 0.644) | 0.322 | |
| **Tidal volume, mL** | -7 | 15.481 (-25.859 to 56.822) | 0.450 | | -9.143 (-22.786 to 4.500) | 0.186 | |
| -6 | 11.514 (-29.439 to 52.466) | 0.570 | | -10.140 (-23.208 to 2.927) | 0.126 | |
| -5 | 7.275 (-35.533 to 50.083) | 0.731 | | -9.157 (-22.680 to 4.366) | 0.181 | |
| -4 | 6.759 (-36.266 to 49.784) | 0.751 | | -9.264 (-23.317 to 4.789) | 0.193 | |
| #: day prior to AECOPD admission; ¶: compare each day with the baseline in each group; *: adjusted p-value from Dunnett’s post hoc test. | | | | | | |

**Table S2 Comparison of parameter recorded by NPPV software in the days before AECOPD between AECOPD group and stable group (-7 day to -4 day)**

| **Parameter** | **Day#** | **AECOPD**  **(n=31)** | **Stable COPD**  **(n=71)** | **Difference (95% CI)*** | **P-value** |
| --- | --- | --- | --- | --- | --- |
| **Respiratory rate, breath/min** | -7 | 19.31±3.15 | 18.77±2.22 | 0.612 (-0.341 to 1.415) | 0.321 |
| -6 | 19.42±3.19 | 18.78±2.22 | 0.723 (-0.213 to 1.802) | 0.281 |
| -5 | 19.62±3.20 | 18.74±2.17 | 0.907 (-0.072 to 2.303) | 0.073 |
| -4 | 20.32±3.21 | 18.72±2.13 | 1.579 (0.499 to 2.658) | 0.005 |
| **Daily use, min/day** | -7 | 421.50±162.29 | 416.56±130.29 | 4.934 (-55.141 to 65.009) | 0.871 |
| -6 | 429.67±173.03 | 421.86±129.52 | 7.812 (-53.673 to 69.298) | 0.801 |
| -5 | 438.85±179.30 | 426.74±127.93 | 12.105 (-49.937 to 74.147) | 0.700 |
| -4 | 451.78±194.66 | 428.76±126.12 | 23.026 (-41.043 to 87.096) | 0.477 |
| **Leaks, L/min** | -7 | 40.00±12.67 | 36.77±13.60 | 3.222 (-2.470 to 8.915) | 0.264 |
| -6 | 39.45±12.63 | 36.74±13.65 | 2.708 (-2.997 to 8.413) | 0.349 |
| -5 | 39.41±12.18 | 36.88±13.86 | 2.532 (-3.182 to 8.246) | 0.381 |
| -4 | 38.92±11.70 | 36.96±13.78 | 1.962 (-3.672 to 7.597) | 0.491 |
| **Tidal volume, mL** | -7 | 597.11±117.62 | 588.36±134.55 | 8.755 (-46.640 to 64.152) | 0.754 |
| -6 | 593.14±118.42 | 587.36±131.95 | 5.785 (-48.902 to 60.472) | 0.834 |
| -5 | 588.91±118.47 | 588.34±134.51 | 0.563 (-54.921 to 56.048) | 0.984 |
| -4 | 588.39±122.71 | 588.23±133.84 | 0.154 (-55.628 to 55.936) | 0.996 |
| #: day prior to AECOPD admission; *: difference between AECOPD and Stable COPD group. | | | | | |
